# Supplementary material for: Should a matched sibling donor still be considered the primary option for allogeneic hematopoietic cell transplantation in patients over 50 years of age with myelodysplastic syndrome?
Source: PubMed Central journal article supplement (PMC10400426; doi:10.1038/s41409-023-01997-3), 2023-05-08
Supplement: 41409_2023_1997_MOESM1_ESM.pdf [file 41409_2023_1997_MOESM1_ESM.pdf]

**Supplementary Figure 1.** Correlation between donor age and recipient age in MSD (a), 8/8MUD (b), and 7/8MUD (C) transplantations.

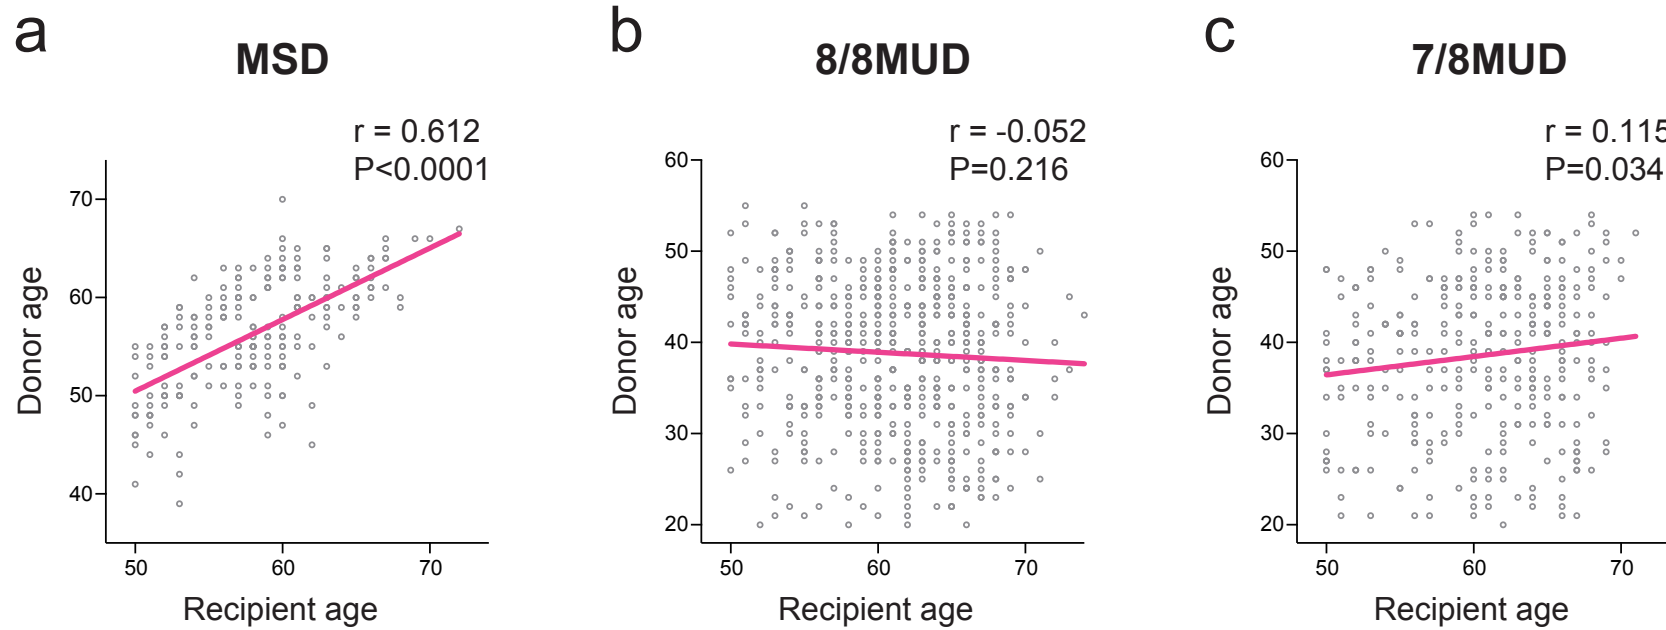

**Supplementary Figure 2.** Unadjusted cumulative incidences of grades III-IV acute GVHD and chronic GVHD following allogeneic HCT using MSDs (a,d), 8/8 MUDs (b,e), and 7/8 MUDs (c,f) for patients with MDS over 50 years of age according to donor age.

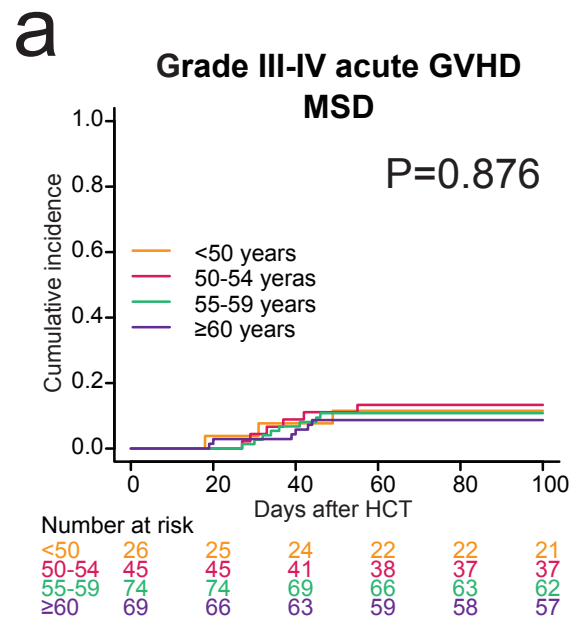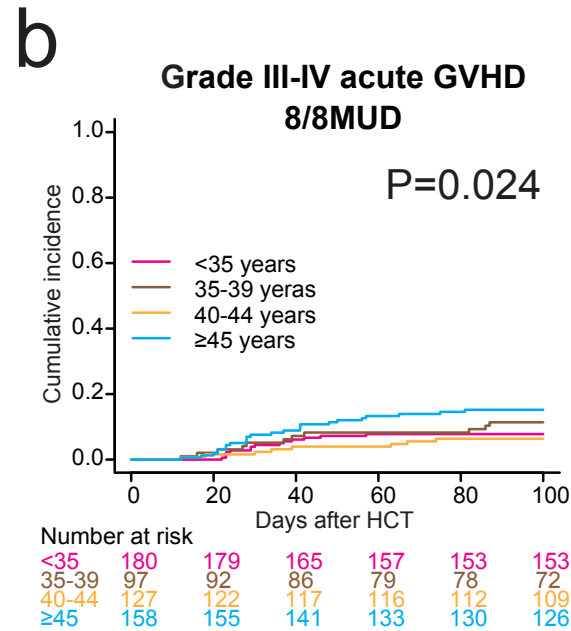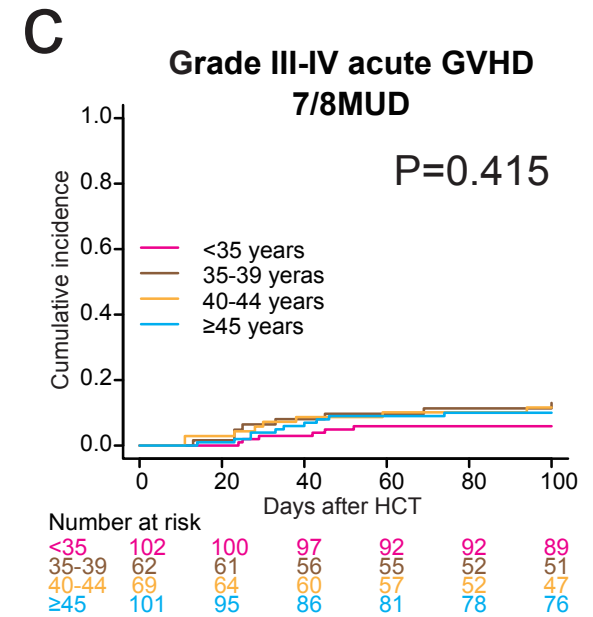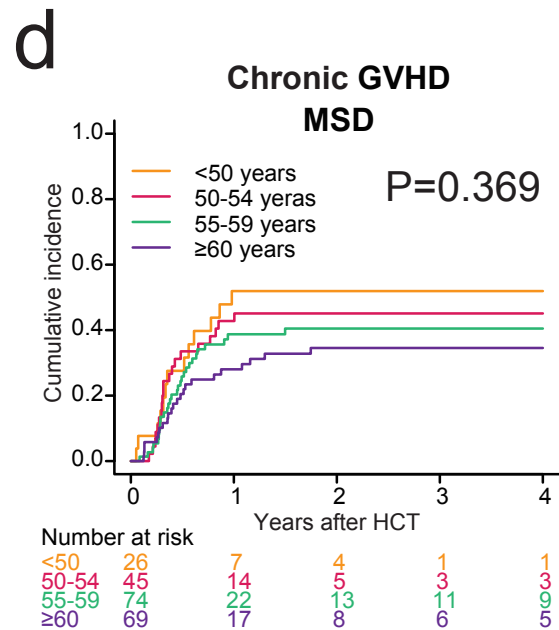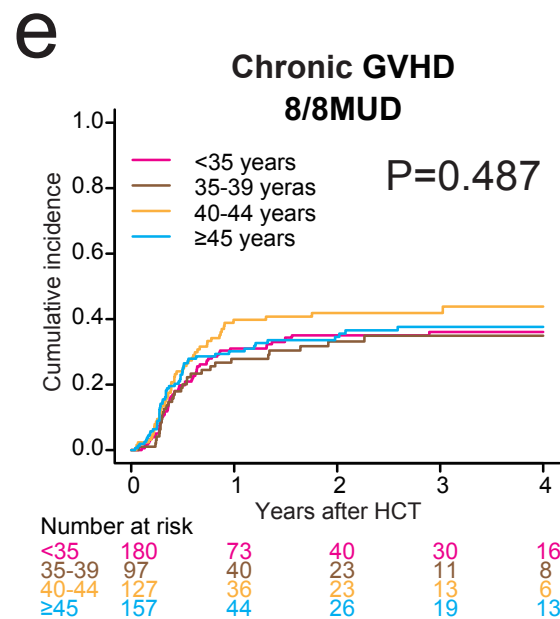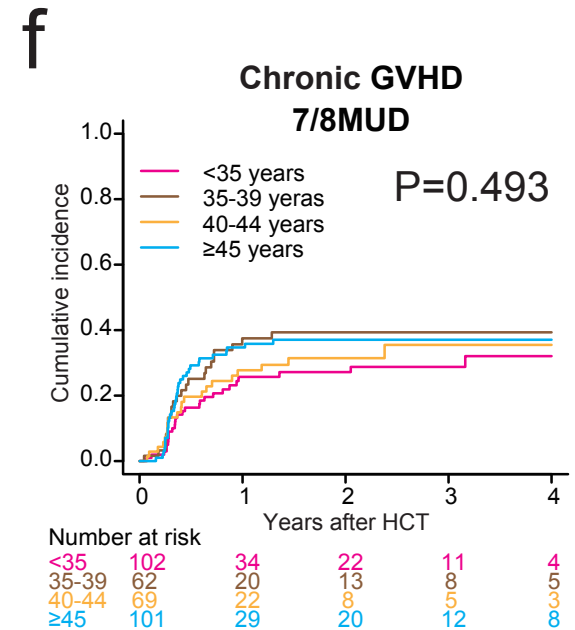

**Supplementary Figure 3.** Unadjusted probabilities of OS following allogeneic HCT using MSDs (a), 8/8 MUDs (b), and 7/8 MUDs (c) for patients with MDS over 50 years of age according to donor age.

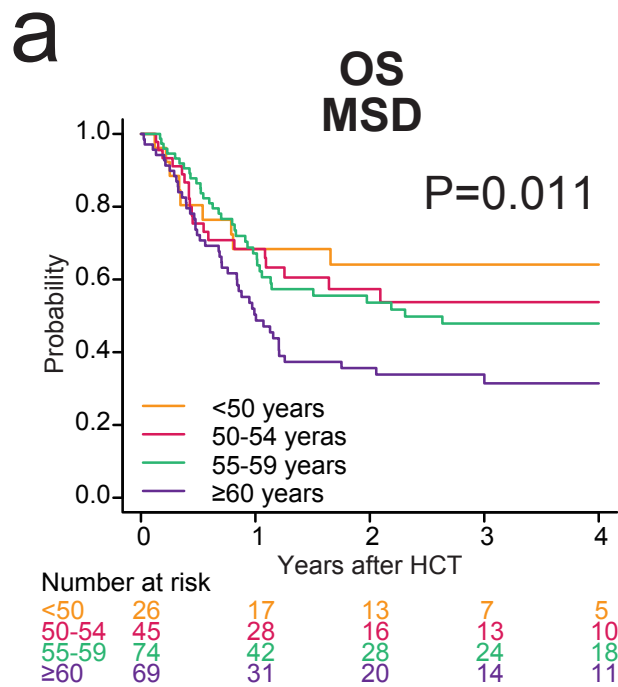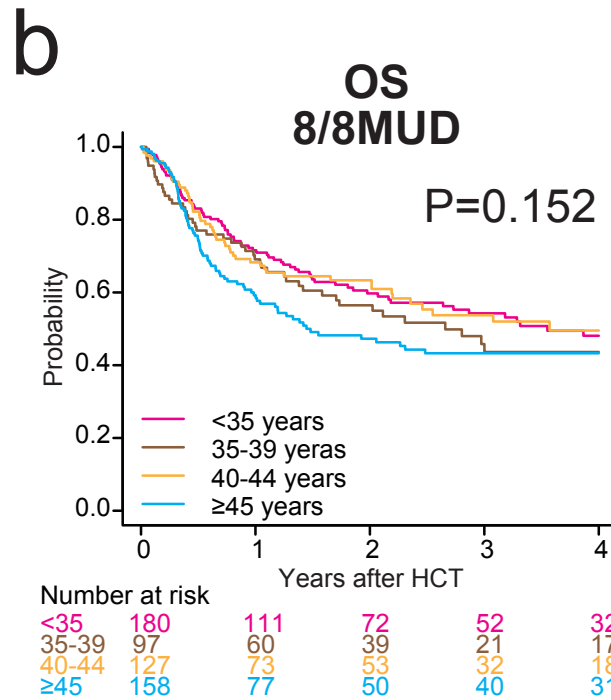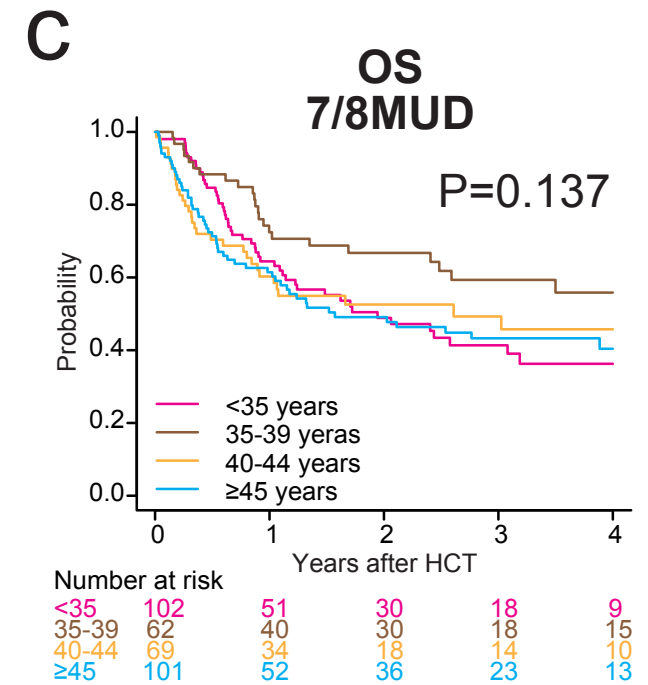

**Supplementary Figure 4.** Unadjusted probabilities of GRFS following allogeneic HCT using MSDs (a), 8/8 MUDs (b), and 7/8 MUDs (c) for patients with MDS over 50 years of age according to donor age.

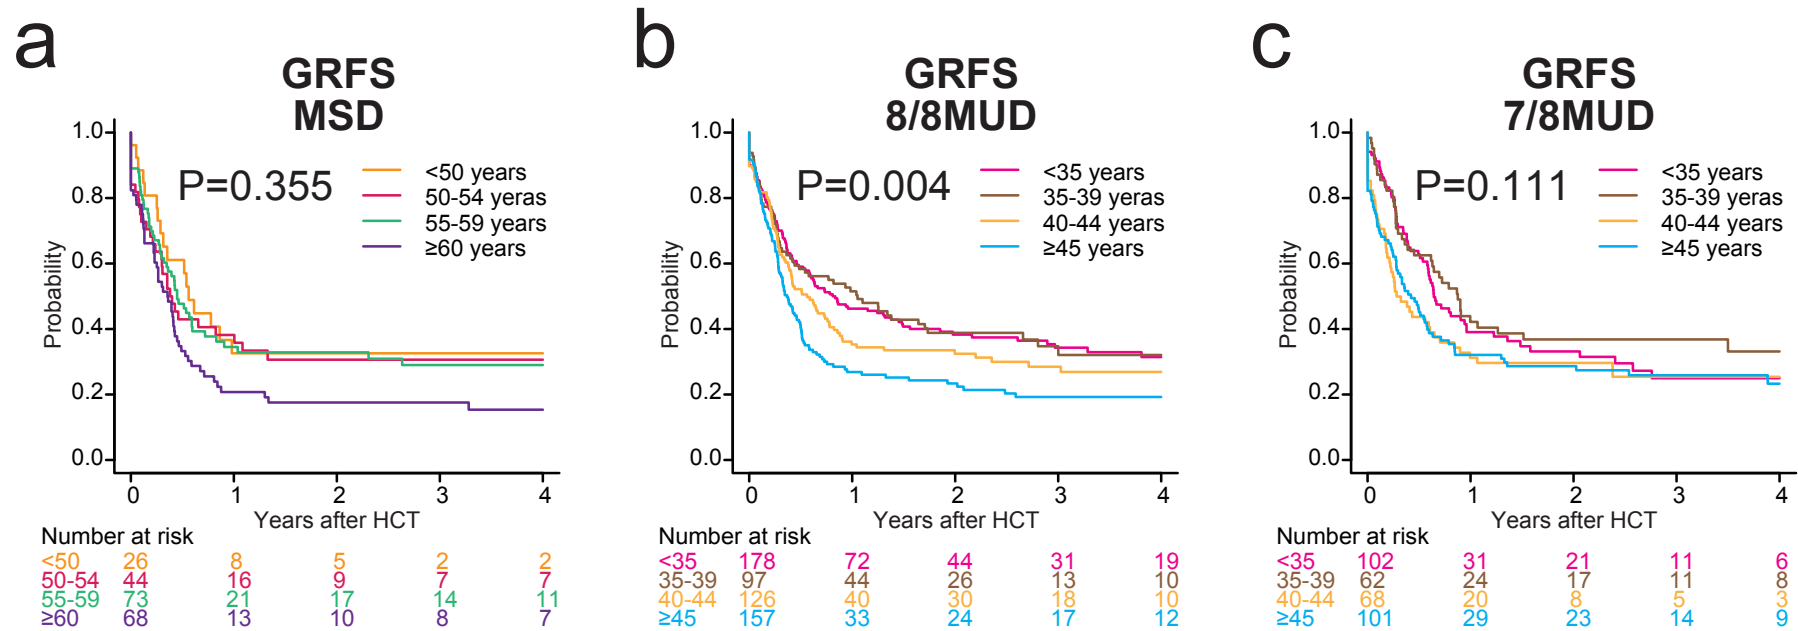

Supplementary Table 1. Multivariate analysis of OS.

|                             |                           | MUD 30 years     |                  | MUD 35 years     |                  | MUD 40 years     |                  | MUD 45 years     |                  |
|-----------------------------|---------------------------|------------------|------------------|------------------|------------------|------------------|------------------|------------------|------------------|
|                             |                           | HR (95%CI)       | P                | HR (95%CI)       | P                | HR (95%CI)       | P                | HR (95%CI)       | P                |
| <b>Donor</b>                |                           |                  |                  |                  |                  |                  |                  |                  |                  |
|                             | MSD                       | Reference        |                  | Reference        |                  | Reference        |                  | Reference        |                  |
|                             | 8/8MUD with younger donor | 0.71 (0.49-1.03) | 0.075            | 0.80 (0.60-1.08) | 0.152            | 0.85 (0.65-1.11) | 0.246            | 0.84 (0.65-1.08) | 0.179            |
|                             | 8/8MUD with older donor   | 0.94 (0.74-1.20) | 0.659            | 0.95 (0.74-1.23) | 0.739            | 0.96 (0.74-1.26) | 0.800            | 1.10 (0.81-1.49) | 0.539            |
|                             | 7/8MUD with younger donor | 1.35 (0.92-1.99) | 0.120            | 1.19 (0.85-1.65) | 0.300            | 0.98 (0.73-1.33) | 0.924            | 1.05 (0.80-1.38) | 0.695            |
|                             | 7/8MUD with older donor   | 0.97 (0.73-1.27) | 0.828            | 0.96 (0.72-1.29) | 0.833            | 1.11 (0.81-1.51) | 0.494            | 1.00 (0.68-1.48) | 0.973            |
| <b>Recipient age</b>        |                           |                  |                  |                  |                  |                  |                  |                  |                  |
|                             | 50-59 years               | Reference        |                  | Reference        |                  | Reference        |                  | Reference        |                  |
|                             | ≥ 60 years                | 1.18 (0.97-1.42) | 0.081            | 1.18 (0.97-1.42) | 0.082            | 1.16 (0.96-1.40) | 0.108            | 1.16 (0.96-1.40) | 0.113            |
| <b>Recipient sex</b>        |                           |                  |                  |                  |                  |                  |                  |                  |                  |
|                             | Female                    | Reference        |                  | Reference        |                  | Reference        |                  | Reference        |                  |
|                             | Male                      | 1.20 (0.98-1.47) | 0.071            | 1.20 (0.98-1.47) | 0.070            | 1.20 (0.98-1.47) | 0.068            | 1.19 (0.97-1.46) | 0.091            |
| <b>PS</b>                   |                           |                  |                  |                  |                  |                  |                  |                  |                  |
|                             | 0-1                       | Reference        |                  | Reference        |                  | Reference        |                  | Reference        |                  |
|                             | 2-4                       | 1.85 (1.35-2.53) | <b>&lt;0.001</b> | 1.87 (1.36-2.57) | <b>&lt;0.001</b> | 1.85 (1.35-2.54) | <b>&lt;0.001</b> | 1.83 (1.33-2.51) | <b>&lt;0.001</b> |
| <b>HCT-CI</b>               |                           |                  |                  |                  |                  |                  |                  |                  |                  |
|                             | 0-2                       | Reference        |                  | Reference        |                  | Reference        |                  | Reference        |                  |
|                             | ≥3                        | 1.45 (1.19-1.76) | <b>&lt;0.001</b> | 1.44 (1.19-1.76) | <b>&lt;0.001</b> | 1.43 (1.18-1.75) | <b>&lt;0.001</b> | 1.43 (1.17-1.74) | <b>&lt;0.001</b> |
| <b>Karyotype</b>            |                           |                  |                  |                  |                  |                  |                  |                  |                  |
|                             | Others                    | Reference        |                  | Reference        |                  | Reference        |                  | Reference        |                  |
|                             | Poor                      | 1.60 (1.34-1.90) | <b>&lt;0.001</b> | 1.60 (1.34-1.91) | <b>&lt;0.001</b> | 1.59 (1.33-1.90) | <b>&lt;0.001</b> | 1.60 (1.34-1.91) | <b>&lt;0.001</b> |
| <b>Disease risk at HCT</b>  |                           |                  |                  |                  |                  |                  |                  |                  |                  |
|                             | Low-risk                  | Reference        |                  | Reference        |                  | Reference        |                  | Reference        |                  |
|                             | High-risk                 | 0.99 (0.82-1.19) | 0.948            | 0.99 (0.82-1.20) | 0.965            | 1.00 (0.83-1.21) | 0.936            | 1.00 (0.83-1.21) | 0.961            |
| <b>Conditioning regimen</b> |                           |                  |                  |                  |                  |                  |                  |                  |                  |
|                             | MAC                       | Reference        |                  | Reference        |                  | Reference        |                  | Reference        |                  |
|                             | RIC                       | 0.83 (0.69-1.00) | 0.060            | 0.82 (0.68-0.99) | <b>0.046</b>     | 0.84 (0.70-1.01) | 0.069            | 0.85 (0.71-1.02) | 0.094            |
| <b>GVHD prophylaxis</b>     |                           |                  |                  |                  |                  |                  |                  |                  |                  |
|                             | With MTX                  | Reference        |                  | Reference        |                  | Reference        |                  | Reference        |                  |
|                             | Without MTX               | 0.70 (0.48-1.04) | 0.082            | 0.70 (0.48-1.04) | 0.083            | 0.70 (0.47-1.04) | 0.078            | 0.72 (0.48-1.06) | 0.101            |
| <b>Use of ATG</b>           |                           |                  |                  |                  |                  |                  |                  |                  |                  |
|                             | No                        | Reference        |                  | Reference        |                  | Reference        |                  | Reference        |                  |
|                             | Yes                       | 0.63 (0.47-0.85) | <b>0.002</b>     | 0.63 (0.47-0.85) | <b>0.002</b>     | 0.63 (0.47-0.85) | <b>0.002</b>     | 0.63 (0.47-0.85) | <b>0.002</b>     |

OS, overall survival; MSD, matched sibling donor; MUD, matched unrelated donor; PS, performance status; HCT-CI, hematopoietic cell transplantation-specific comorbidity index; HCT, hematopoietic cell transplantation; MAC, myeloablative conditioning; RIC, reduced-intensity conditioning; GVHD, graft-versus-host disease; MTX, methotrexate; ATG, antithymocyte globulin; HR, hazard ratio; CI, confidence interval.

The P values in bold are statistically significant (<0.05).

**Supplementary Table 2.** Multivariate analysis of GRFS.

|                             |                           | <b>MUD 30 years</b> |                  | <b>MUD 35 years</b> |                  | <b>MUD 40 years</b> |                  | <b>MUD 45 years</b> |                  |
|-----------------------------|---------------------------|---------------------|------------------|---------------------|------------------|---------------------|------------------|---------------------|------------------|
|                             |                           | HR (95%CI)          | P                | HR (95%CI)          | P                | HR (95%CI)          | P                | HR (95%CI)          | P                |
| <b>Donor</b>                |                           |                     |                  |                     |                  |                     |                  |                     |                  |
|                             | MSD                       | Reference           |                  | Reference           |                  | Reference           |                  | Reference           |                  |
|                             | 8/8MUD with younger donor | 0.65 (0.48-0.89)    | <b>0.007</b>     | 0.69 (0.54-0.89)    | <b>0.004</b>     | 0.73 (0.59-0.92)    | <b>0.007</b>     | 0.77 (0.63-0.95)    | <b>0.016</b>     |
|                             | 8/8MUD with older donor   | 0.89 (0.73-1.09)    | 0.289            | 0.94 (0.76-1.15)    | 0.564            | 0.99 (0.79-1.24)    | 0.976            | 1.12 (0.86-1.45)    | 0.376            |
|                             | 7/8MUD with younger donor | 1.07 (0.77-1.50)    | 0.664            | 0.93 (0.70-1.24)    | 0.657            | 0.84 (0.65-1.09)    | 0.196            | 0.95 (0.76-1.20)    | 0.699            |
|                             | 7/8MUD with older donor   | 0.92 (0.74-1.16)    | 0.530            | 0.97 (0.76-1.23)    | 0.804            | 1.11 (0.86-1.44)    | 0.401            | 0.99 (0.72-1.36)    | 0.967            |
| <b>Recipient age</b>        |                           |                     |                  |                     |                  |                     |                  |                     |                  |
|                             | 50-59 years               | Reference           |                  | Reference           |                  | Reference           |                  | Reference           |                  |
|                             | ≥ 60 years                | 1.15 (0.98-1.34)    | 0.077            | 1.15 (0.98-1.34)    | 0.078            | 1.14 (0.98-1.33)    | 0.087            | 1.13 (0.96-1.32)    | 0.118            |
| <b>Recipient sex</b>        |                           |                     |                  |                     |                  |                     |                  |                     |                  |
|                             | Female                    | Reference           |                  | Reference           |                  | Reference           |                  | Reference           |                  |
|                             | Male                      | 1.14 (0.96-1.34)    | 0.118            | 1.13 (0.96-1.34)    | 0.122            | 1.13 (0.96-1.34)    | 0.132            | 1.12 (0.95-1.32)    | 0.172            |
| <b>PS</b>                   |                           |                     |                  |                     |                  |                     |                  |                     |                  |
|                             | 0-1                       | Reference           |                  | Reference           |                  | Reference           |                  | Reference           |                  |
|                             | 2-4                       | 1.54 (1.16-2.05)    | <b>0.002</b>     | 1.57 (1.18-2.09)    | <b>0.001</b>     | 1.59 (1.20-2.11)    | <b>0.001</b>     | 1.58 (1.18-2.10)    | <b>0.001</b>     |
| <b>HCT-CI</b>               |                           |                     |                  |                     |                  |                     |                  |                     |                  |
|                             | 0-2                       | Reference           |                  | Reference           |                  | Reference           |                  | Reference           |                  |
|                             | ≥3                        | 1.10 (0.93-1.31)    | 0.247            | 1.10 (0.92-1.30)    | 0.265            | 1.08 (0.91-1.28)    | 0.373            | 1.08 (0.91-1.28)    | 0.362            |
| <b>Karyotype</b>            |                           |                     |                  |                     |                  |                     |                  |                     |                  |
|                             | Others                    | Reference           |                  | Reference           |                  | Reference           |                  | Reference           |                  |
|                             | Poor                      | 1.43 (1.23-1.65)    | <b>&lt;0.001</b> | 1.43 (1.24-1.66)    | <b>&lt;0.001</b> | 1.42 (1.23-1.65)    | <b>&lt;0.001</b> | 1.44 (1.24-1.67)    | <b>&lt;0.001</b> |
| <b>Disease risk at HCT</b>  |                           |                     |                  |                     |                  |                     |                  |                     |                  |
|                             | Low-risk                  | Reference           |                  | Reference           |                  | Reference           |                  | Reference           |                  |
|                             | High-risk                 | 1.01 (0.86-1.18)    | 0.852            | 1.01 (0.86-1.18)    | 0.856            | 1.02 (0.87-1.20)    | 0.749            | 1.01 (0.86-1.19)    | 0.820            |
| <b>Conditioning regimen</b> |                           |                     |                  |                     |                  |                     |                  |                     |                  |
|                             | MAC                       | Reference           |                  | Reference           |                  | Reference           |                  | Reference           |                  |
|                             | RIC                       | 0.80 (0.69-0.94)    | <b>0.006</b>     | 0.80 (0.68-0.93)    | <b>0.005</b>     | 0.80 (0.69-0.94)    | <b>0.007</b>     | 0.81 (0.69-0.95)    | <b>0.010</b>     |
| <b>GVHD prophylaxis</b>     |                           |                     |                  |                     |                  |                     |                  |                     |                  |
|                             | With MTX                  | Reference           |                  | Reference           |                  | Reference           |                  | Reference           |                  |
|                             | Without MTX               | 0.91 (0.68-1.22)    | 0.544            | 0.91 (0.68-1.23)    | 0.560            | 0.89 (0.66-1.20)    | 0.463            | 0.92 (0.68-1.23)    | 0.586            |
| <b>Use of ATG</b>           |                           |                     |                  |                     |                  |                     |                  |                     |                  |
|                             | No                        | Reference           |                  | Reference           |                  | Reference           |                  | Reference           |                  |
|                             | Yes                       | 0.57 (0.45-0.73)    | <b>&lt;0.001</b> | 0.57 (0.44-0.73)    | <b>&lt;0.001</b> | 0.57 (0.44-0.73)    | <b>&lt;0.001</b> | 0.57 (0.44-0.72)    | <b>&lt;0.001</b> |

GRFS, graft-versus-host disease (GVHD)-free, relapse-free survival; MSD, matched sibling donor; MUD, matched unrelated donor; PS, performance status; HCT-CI, hematopoietic cell transplantation-specific comorbidity index; HCT, hematopoietic cell transplantation; MAC, myeloablative conditioning; RIC, reduced-intensity conditioning; GVHD, graft-versus-host disease; MTX, methotrexate; ATG, antithymocyte globulin; HR, hazard ratio; CI, confidence interval.

The P values in bold are statistically significant (<0.05).
